# Supplementary material for: Push out bond strength of hydraulic cements used at different thicknesses
Source: BMC Oral Health. 2023 Feb 7;23:81. doi: 10.1186/s12903-023-02758-w (PMC9906962; doi:10.1186/s12903-023-02758-w)
Supplement: Supplementary file 2 — Additional file 2. Excell Table of Raw Data. [file 12903_2023_2758_MOESM2_ESM.xlsx]

## Sheet: Hoja2
MUESTRA	MATERIAL	GROSOR	FUERZA (N)	RESISTENCIA (Mpa)
1	1	3	23.66	1.794			Material
2	1	3	52.4	3.973			1	TOTALFILL
3	1	3	40.78	3.092			2	BIODENTINE
4	1	3	45.92	3.481			3	MTA
5	1	3	37.18	2.819
6	1	3	28.26	2.142
7	1	3	16.8	1.273
8	1	3	68.08	5.162
9	1	3	32.02	2.427
10	1	3	44.8	3.397
11	1	3	44.56	3.378
12	1	3	52.54	3.983
13	1	3	105.64	8.01
14	1	3	48.42	3.671
15	1	3	70.36	5.335
16	1	3	56.88	4.313
17	1	3	83.32	6.317
18	1	3	38.64	2.929
19	1	3	71.02	5.385
20	1	3	101.62	7.705
21	1	3	82.14	6.228
22	1	3	57	4.322
23	1	3	45.18	3.425
24	1	3	17.64	1.337
25	1	3	104.72	7.94
26	1	3	52.96	4.015
1	1	5	102.82	4.677
2	1	5	34.7	1.578
3	1	5	193.16	8.787
4	1	5	43.5	1.979
5	1	5	76.5	3.48
6	1	5	98.52	4.482
7	1	5	221.24	10.065
8	1	5	77.98	3.547
9	1	5	99.78	4.539
10	1	5	173.1	7.875
11	1	5	41.1	1.869
12	1	5	97.52	4.436
13	1	5	172.28	7.838
14	1	5	72.24	3.286
15	1	5	124.88	5.681
16	1	5	151.16	6.877
17	1	5	213.98	9.735
18	1	5	86.4	3.93
19	1	5	149.02	6.779
20	1	5	150.68	6.855
21	1	5	86.48	3.934
22	1	5	144.32	6.565
23	1	5	92.76	4.22
24	1	5	144.96	6.595
25	1	5	213.54	9.715
26	1	5	45.28	2.06
1	2	3	80.22	6.082
2	2	3	116	8.795
3	2	3	78.12	5.923
4	2	3	118.58	8.991
5	2	3	92.82	7.038
6	2	3	79.9	6.058
7	2	3	48.88	3.706
8	2	3	55.2	4.185
9	2	3	141	10.691
10	2	3	119.88	9.09
11	2	3	53.92	4.088
12	2	3	60.8	4.61
13	2	3	89.78	6.807
14	2	3	67.42	5.112
15	2	3	84.7	6.422
16	2	3	84.9	6.437
17	2	3	139.66	10.589
18	2	3	63.48	4.813
19	2	3	108.96	8.262
20	2	3	98.98	7.505
21	2	3	69.12	5.241
22	2	3	43.94	3.331
23	2	3	116.36	8.823
24	2	3	131.12	9.942
25	2	3	48.36	3.666
26	2	3	88.34	6.698
1	2	5	110.94	5.047
2	2	5	268.06	12.195
3	2	5	100.64	4.578
4	2	5	210.1	9.558
5	2	5	165.58	7.533
6	2	5	163.84	7.454
7	2	5	131.1	5.964
8	2	5	178.14	8.104
9	2	5	230.76	10.498
10	2	5	223.16	10.152
11	2	5	201.86	9.183
12	2	5	168.82	7.68
13	2	5	214.26	9.747
14	2	5	153.56	6.986
15	2	5	149.88	6.818
16	2	5	146.92	6.684
17	2	5	192.46	8.756
18	2	5	207.94	9.46
19	2	5	198.78	9.043
20	2	5	127.52	5.801
21	2	5	100.36	4.565
22	2	5	119.8	5.45
23	2	5	187.16	8.515
24	2	5	178.08	8.101
25	2	5	259.54	11.808
26	2	5	226.94	10.324
1	3	3	139.88	10.606
2	3	3	79.88	6.057
3	3	3	118.58	8.991
4	3	3	83.74	6.349
5	3	3	88.56	6.715
6	3	3	54.04	4.097
7	3	3	95.92	7.273
8	3	3	191.72	14.537
9	3	3	70.14	5.318
10	3	3	65.46	4.963
11	3	3	152.12	11.534
12	3	3	100	7.582
13	3	3	139.24	10.558
14	3	3	84.9	6.437
15	3	3	89.34	6.774
16	3	3	81.22	6.158
17	3	3	90.24	6.842
18	3	3	75.16	5.699
19	3	3	73.68	5.586
20	3	3	167.66	12.713
21	3	3	143	10.843
22	3	3	81.36	6.169
23	3	3	83.04	6.296
24	3	3	101.18	7.672
25	3	3	138.04	10.467
26	3	3	172.28	13.063
1	3	5	141.62	6.443
2	3	5	64.2	2.92
3	3	5	84.36	3.838
4	3	5	61.54	2.799
5	3	5	163.78	7.451
6	3	5	63.42	2.885
7	3	5	171.06	7.782
8	3	5	177.38	8.07
9	3	5	165.98	7.551
10	3	5	163.06	7.418
11	3	5	180.08	8.192
12	3	5	202.04	9.191
13	3	5	223.4	10.163
14	3	5	72.06	3.278
15	3	5	247.86	11.276
16	3	5	56.78	2.583
17	3	5	136.64	6.216
18	3	5	91.02	4.141
19	3	5	59.74	2.717
20	3	5	267.64	12.175
21	3	5	108.78	4.949
22	3	5	66.88	3.042
23	3	5	263.4	11.983
24	3	5	181	8.234
25	3	5	85.62	3.895
26	3	5	237.68	10.813
